# Supplementary material for: Enhanced DNA release from disulfide-containing layered nanocomplexes by heparin-electrostatic competition
Source: Royal Society of Chemistry journal article supplement (doi:10.1039/c4tb01113a), 2014-10-27
Supplement: c4tb01113a1.pdf [file c4tb01113a1.pdf]

## **Enhanced DNA release from disulfide-containing layered nanocomplexes by heparin-electronic competition**

*Zhenzhen Chen, Yuling He, Lifan Zhang\*, Yanfeng Li*

*State Key Laboratory of Applied Organic Chemistry, Key Laboratory of Nonferrous Metals Chemistry and Resources Utilization of Gansu Province, College of Chemistry and Chemical Engineering, Lanzhou University, Lanzhou 730000, China*

**\*Correspondence to:**

Lifan Zhang (email: [lfzhang@lzu.edu.cn](mailto:lfzhang@lzu.edu.cn))

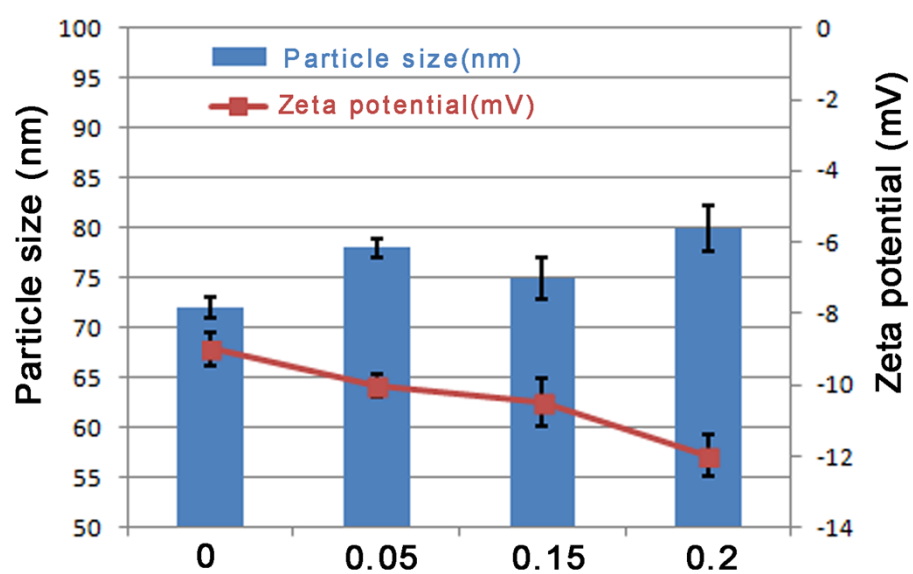

**Supporting Figure S1.** Size and zeta potential of different surface cross-linked PEI 25 kDa/ DNA polyplexes

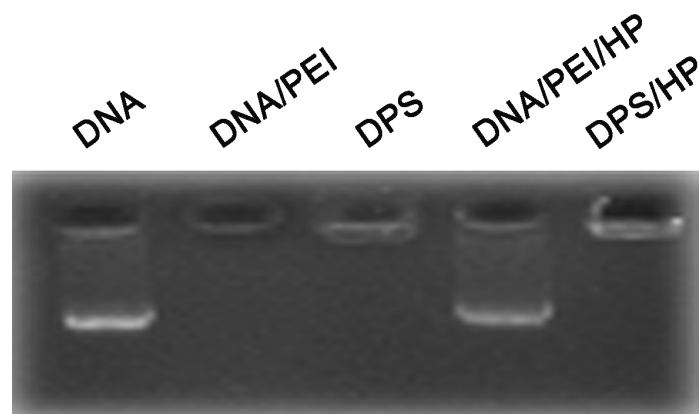

**Supporting Figure S2.** Gel retardation assay of the complexes.
